# Supplementary material
Source: publisher figshare collection journal article supplement (https://springernature.figshare.com/ndownloader/files/14305109)

Incidence of use per age and gender per 1000 inhabitants 18+

18-44, F

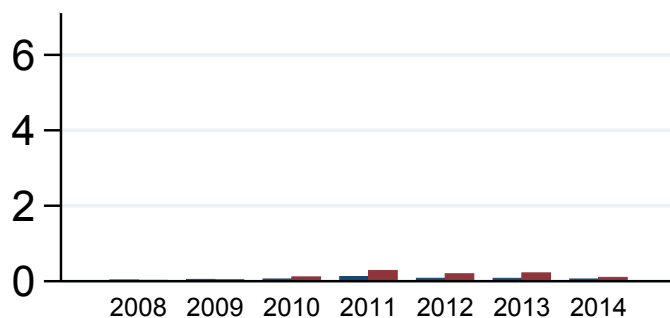

18-44, M

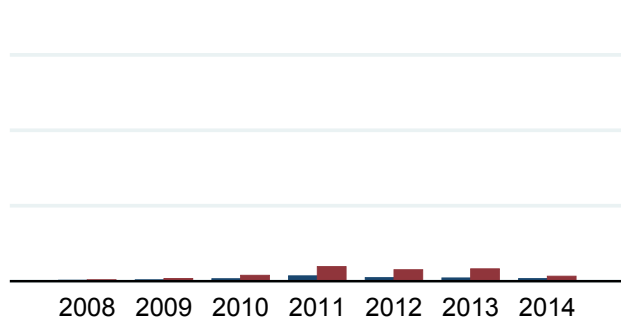

45-64, F

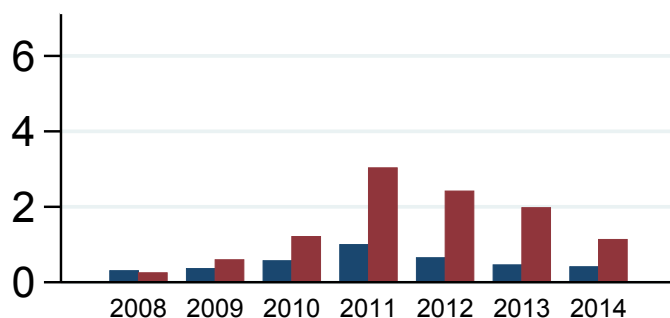

45-64, M

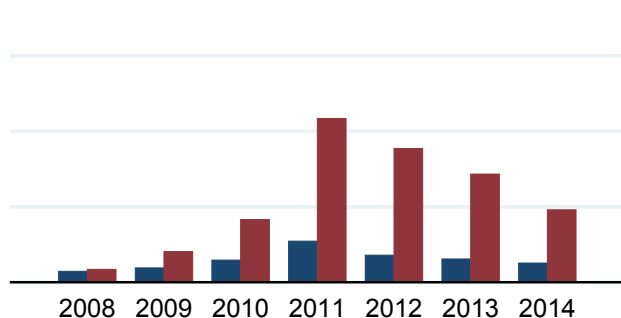

65-84, F

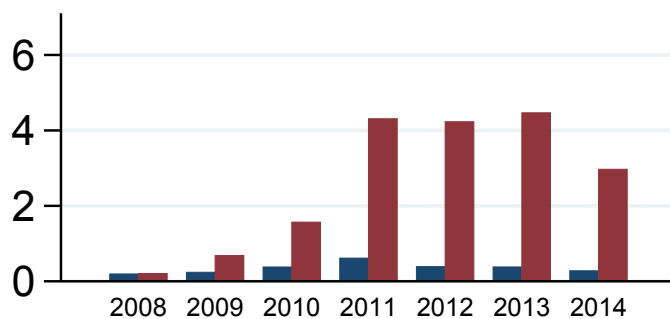

65-84, M

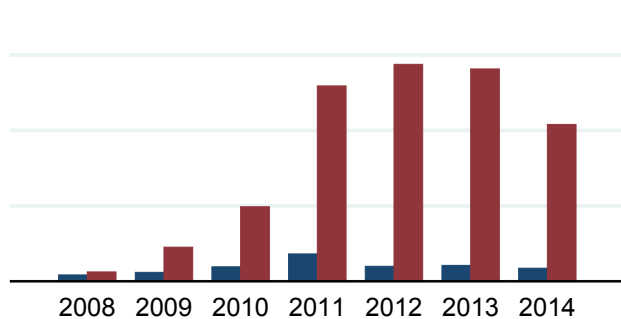

85+, F

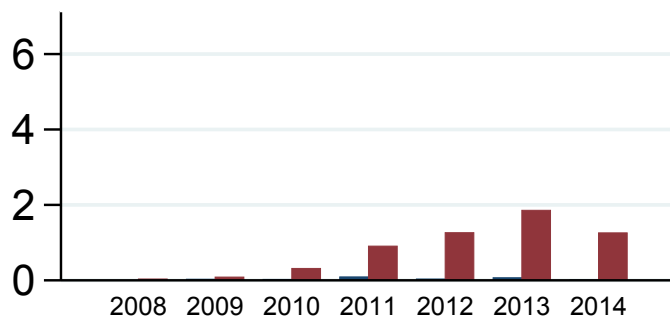

85+, M

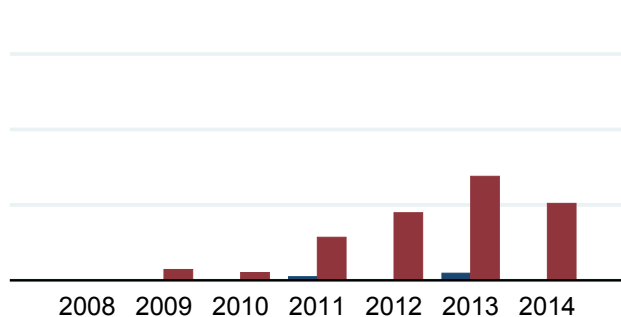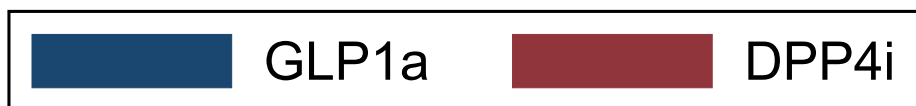

Supplement: Supplementary file 1 [file 14305109]
